# Supplementary material for: Unusual singlet oxygen-dependent hydroxyl radical production by a unique ruthenium-polypyridyl-hydroxamate complex under visible light irradiation
Source: Royal Society of Chemistry journal article supplement (doi:10.1039/d4qi00853g), 2024-01-01
Supplement: d4qi00853g1.pdf [file d4qi00853g1.pdf]

**Supplementary Information for**

**Unusual Singlet Oxygen-dependent Hydroxyl Radical Production by a Unique Ruthenium-Polypyridyl-Hydroxamate Complex under Visible Light Irradiation**

Tian-Shu Tang<sup>a,b</sup>, Li Mao<sup>a,b,\*</sup>, Chun-Hua Huang<sup>a,b</sup>, Chuan-Fang Zhao<sup>a,b</sup>,  
Zhi-Sheng Liu<sup>a,b</sup>, Jing Chen<sup>a,b</sup>, Ben-Zhan Zhu<sup>a,b,c,\*</sup>

<sup>a</sup> State Key Laboratory of Environmental Chemistry and Ecotoxicology, Research Center for Eco-Environmental Sciences, The Chinese Academy of Sciences, Beijing, 100085, PR China

<sup>b</sup> College of Resources and Environment, University of Chinese Academy of Sciences, Beijing, 100049, PR China

<sup>c</sup> Linus Pauling Institute, Oregon State University, Corvallis, OR, 97331, USA

\*Co- Corresponding Authors. E-mail: limao@rcees.ac.cn; bzhu@rcees.ac.cn

**This PDF file includes:**

Figures S1 to S10

Table S1

## Supporting Figures

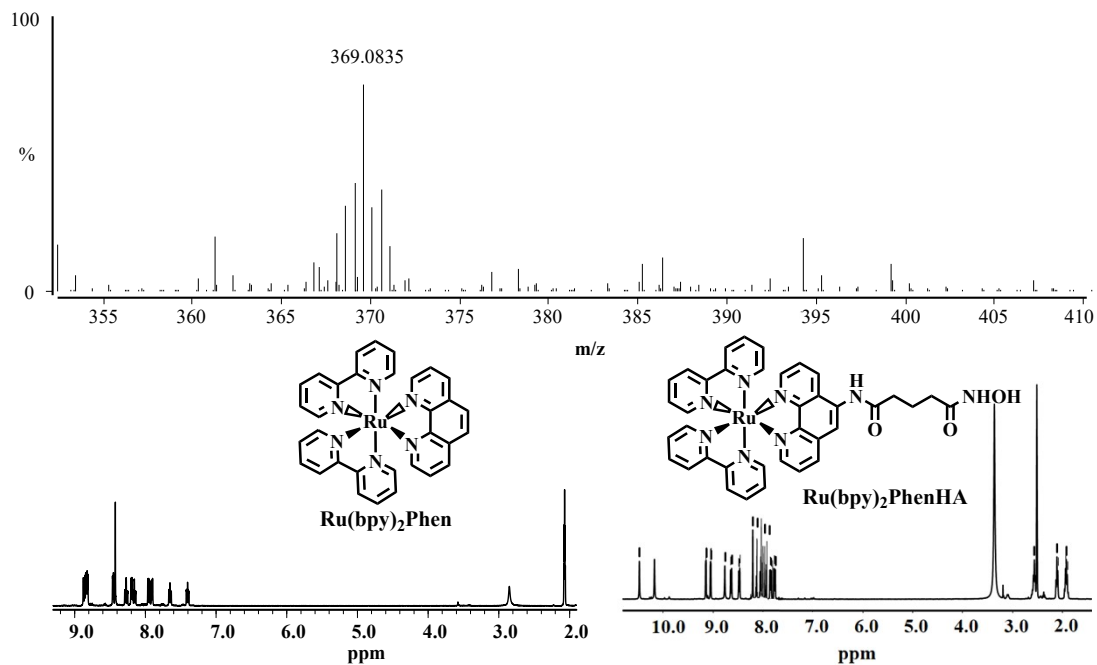

Figure S1. Mass and <sup>1</sup>H-NMR spectra of purified Ru(bpy)<sub>2</sub>PhenHA.

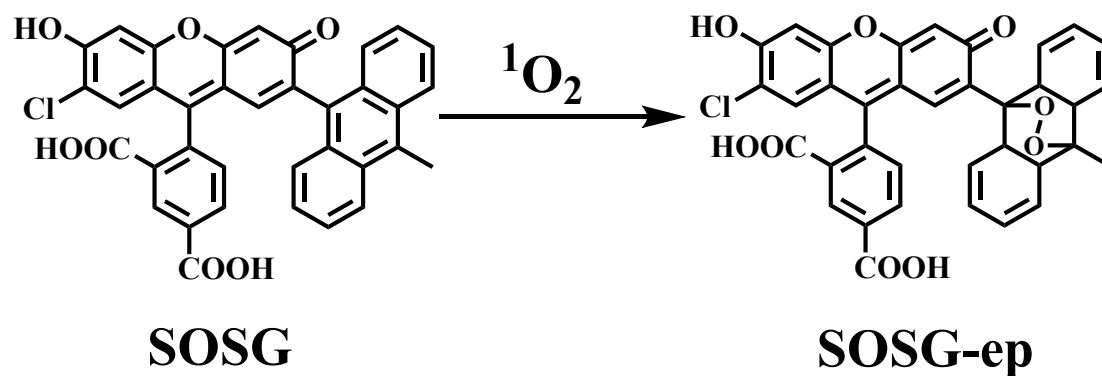

Figure S2. The principle of  $^1\text{O}_2$  detection by SOSG.

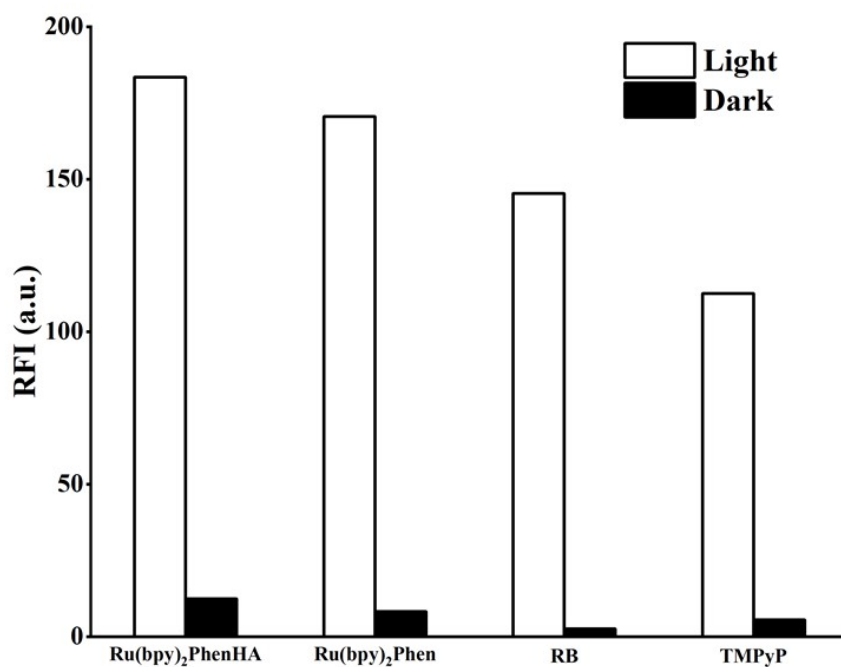

**Figure S3. The  $^1\text{O}_2$ -generating ability of Ru(bpy)<sub>2</sub>PhenHA/VIS is stronger than that of three other photosensitizers as measured by fluorescence analysis with SOSG as the  $^1\text{O}_2$  probe. All reaction mixtures contained 100  $\mu\text{M}$  photosensitizer and 5  $\mu\text{M}$  SOSG in the Chelex-pretreated phosphate buffer (100 mM, pH 7.4) under 20 min light irradiation before fluorescence detection at room temperature.**

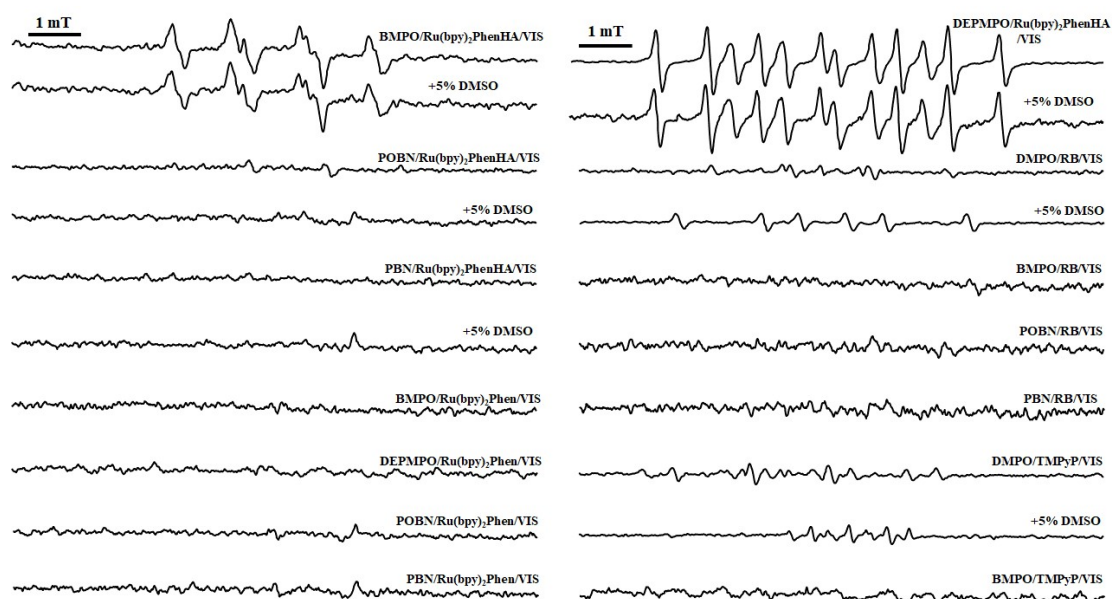

**Figure S4. ESR signal of the visible light irradiation of Ru(bpy)<sub>2</sub>PhenHA and other photosensitizers in the presence of several other spin trapping agents.** All reactions were conducted in the Chelex-pretreated phosphate buffer (100 mM, pH 7.4) under continuous irradiation during the process of ESR detection at room temperature. For all reactions, 100 μM photosensitizers, 5% DMSO and 100 mM spin trapping agents were used.

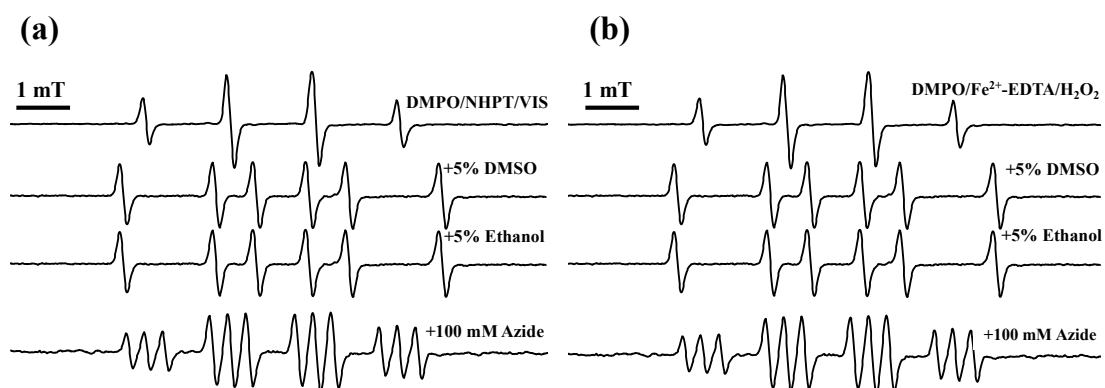

**Figure S5.  $\cdot\text{OH}$  production in NHPT/UV (a) and  $\text{Fe}^{2+}$ -EDTA/ $\text{H}_2\text{O}_2$  (b) systems can be markedly quenched by the addition of three typical  $\cdot\text{OH}$  scavengers.** All reactions were carried out at room temperature in the Chelex-pretreated phosphate buffer (100 mM, pH 7.4). For (a), 1 mM NHPT, and 100 mM DMPO were used. For (b), 1 mM  $\text{Fe}^{2+}$ -EDTA, 100 mM  $\text{H}_2\text{O}_2$  and DMPO were used.

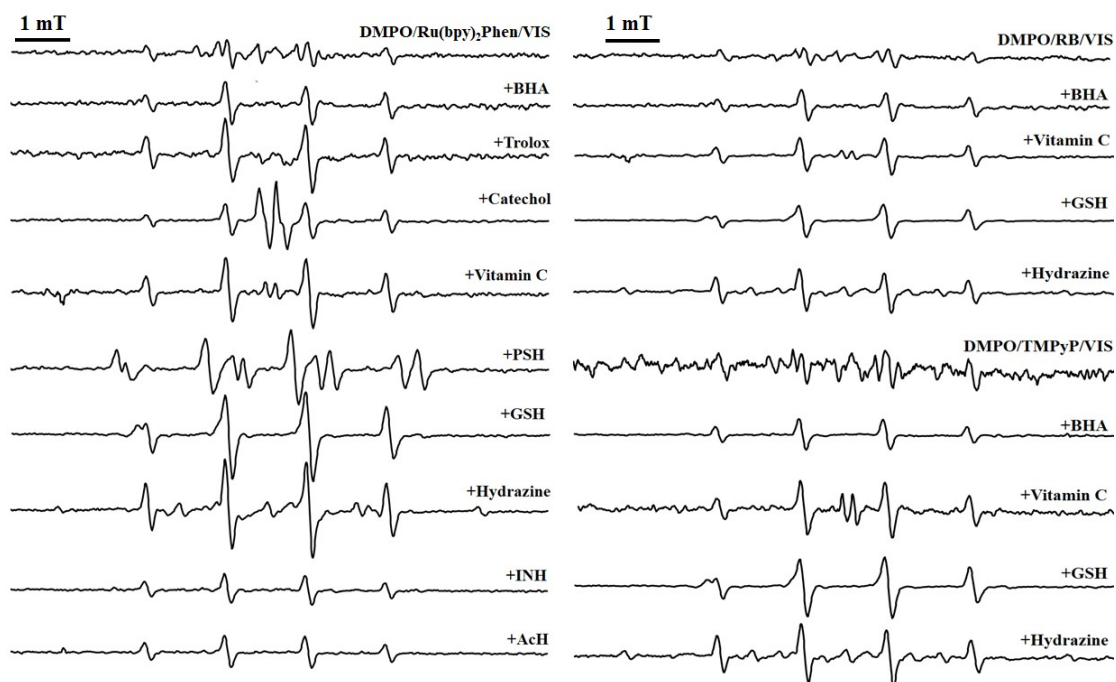

**Figure S6. ESR signal of DMPO/phototosensitizer/VIS in the presence of several structurally different reducing agents.** Three kinds of typical phototosensitizers including Ru(bpy)<sub>2</sub>Phen, rose bengal (RB) and TMPyP were used. All reactions were conducted in the Chelex-pretreated phosphate buffer (100 mM, pH 7.4) under continuous irradiation during the process of ESR detection at room temperature. For all reaction mixtures, 100 μM phototosensitizers, 100 μM reducing agents and 100 mM DMPO were used.

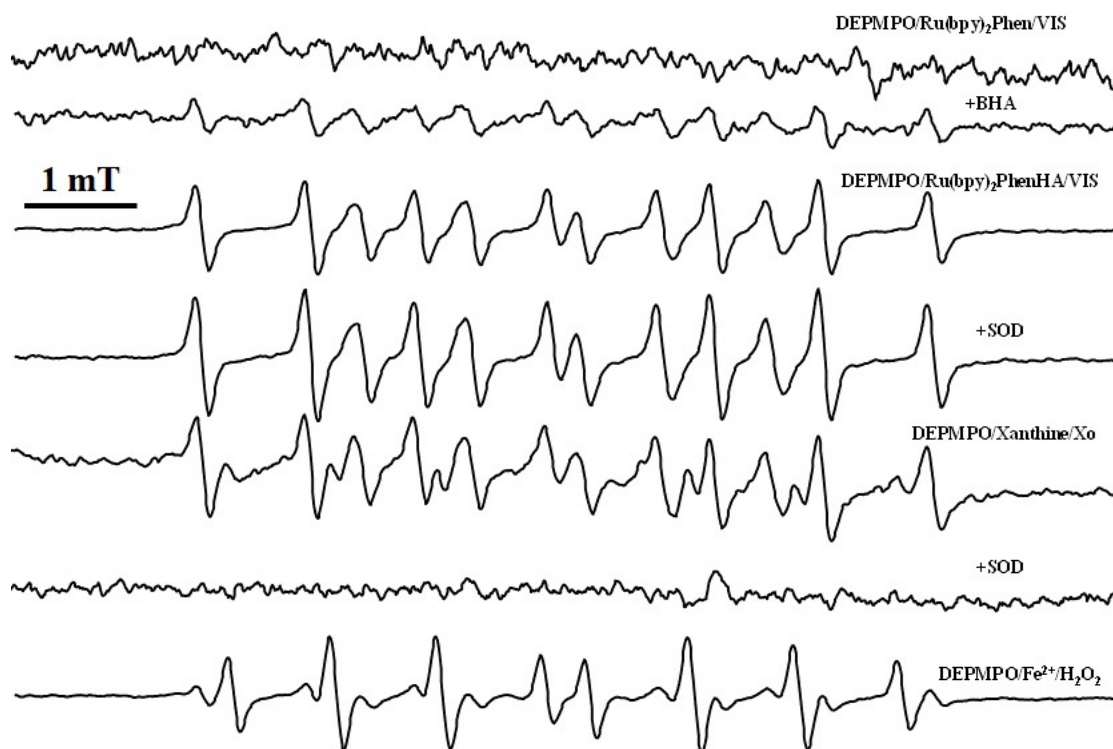

**Figure S7. Typical ESR signal of the radical form of DEPMPPO-OOH adduct can be detected from DEPMPPO/Ru(bpy)<sub>2</sub>PhenHA/VIS and DEPMPPO/Ru(bpy)<sub>2</sub>Phen/BHA/VIS by ESR spin trapping method.** All reactions were conducted in the Chelex-pretreated phosphate buffer (100 mM, pH 7.4) under continuous irradiation during the process of ESR detection at room temperature. 100  $\mu$ M Ru(bpy)<sub>2</sub>PhenHA or Ru(bpy)<sub>2</sub>Phen, 100  $\mu$ M BHA, 100 mM DEPMPPO, 1 mM xanthine and 0.01 U XO, 1000 U SOD, 1 mM Fe<sup>2+</sup>-EDTA, and 100 mM H<sub>2</sub>O<sub>2</sub> were used.



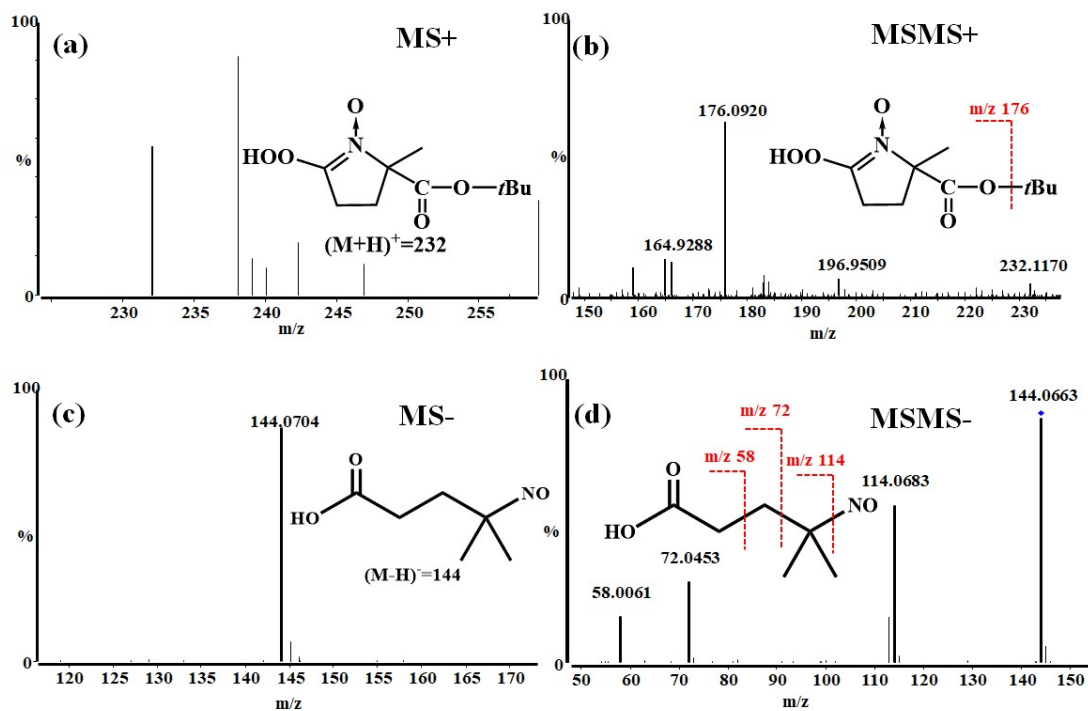

**Figure S8. Unequivocal identification of BMPO-OOH adduct and final product from BMPO/Ru(bpy)<sub>2</sub>PhenHA/VIS by ESI-Q-TOF-MS.** (a) The ESI-Q-TOF-MS spectra of BMPO-OOH adduct. (b) MS/MS spectrum of the ion peak at m/z 232. (c) The ESI-Q-TOF-MS spectra of open-ring product. (d) MS/MS spectrum of the ion peak at m/z 144. Reactions were carried out at room temperature in the Chelex-pretreated ammonium acetate buffer (100 mM, pH 7.4).

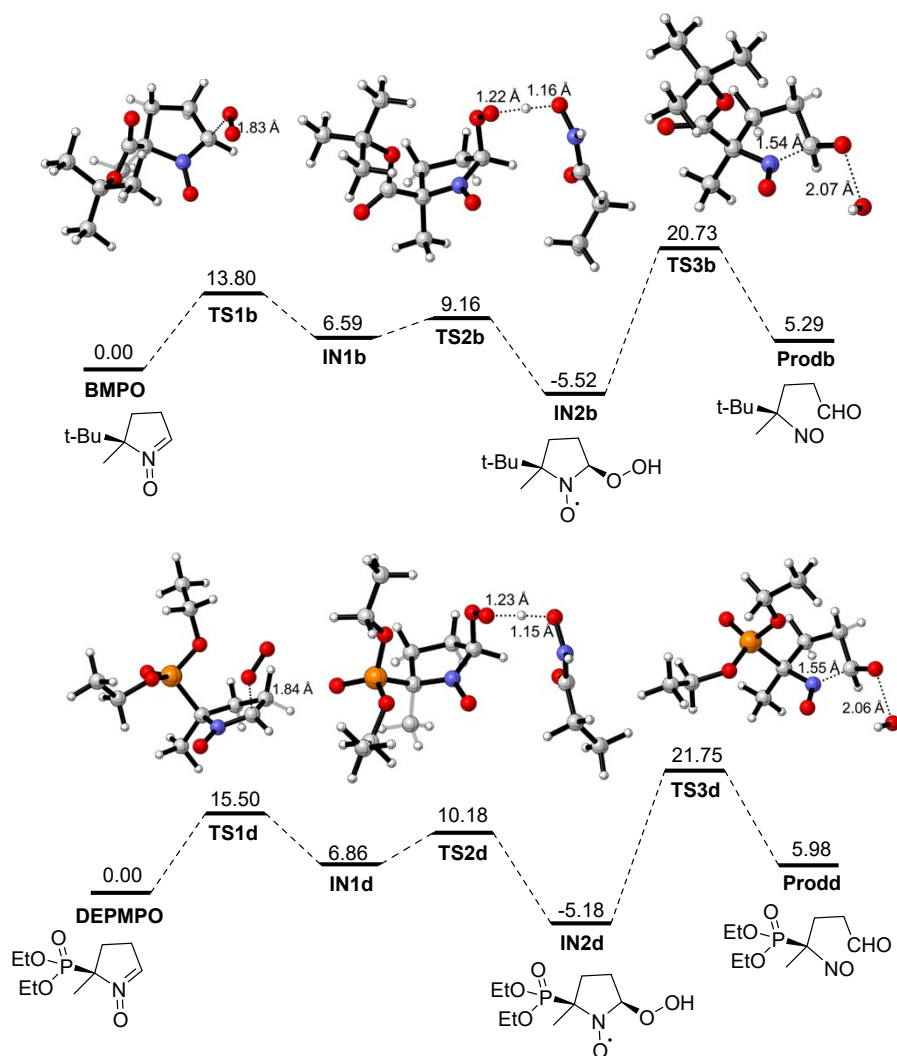

**Figure S9. Computational study on the reaction pathway of BMPO (top) and DEPMPO (bottom) with  $^1\text{O}_2$  and HA.**

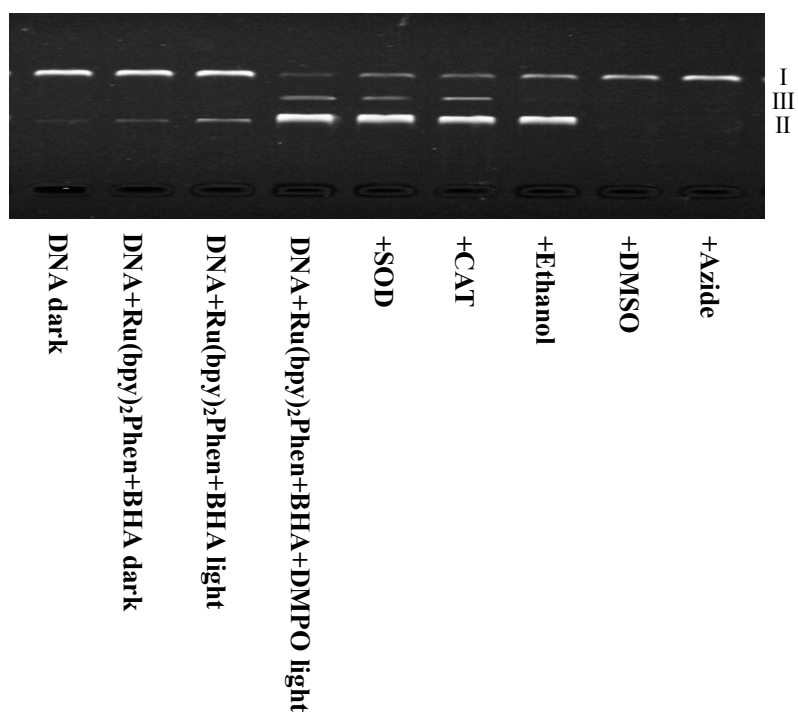

**Figure S10. Gel-electrophoretic detection of DNA strand breaks induced by  $\text{Ru}(\text{bpy})_2\text{Phen}/\text{DMPO}/\text{VIS}$ .** Different DNA forms: Form I, closed circular supercoiled DNA; Form II, open circle DNA; Form III, linear DNA. All reactions were conducted in the Chelex-pretreated phosphate buffer (100 mM, pH 7.4) under dark or the indicated VIS irradiation ( $1.5 \text{ mW}/\text{cm}^2$  at 450 nm) at room temperature. Reaction mixtures contained  $100 \mu\text{M}$   $\text{Ru}(\text{bpy})_2\text{Phen}$  and  $100 \mu\text{M}$  DMPO.  $100 \mu\text{M}$  BHA,  $1000\text{U}$  SOD or catalase, 5% ethanol or DMSO, or  $100 \text{ mM}$  azide were used.

## Supporting Tables

**Table S1. XYZ coordinates related to the optimized species.**

**DMPO**  
Standard orientation:

| Center Number | Atomic Number | Atomic Type | Coordinates (Angstroms) |           |           |
|---------------|---------------|-------------|-------------------------|-----------|-----------|
|               |               |             | X                       | Y         | Z         |
| 1             | 6             | 0           | 1.427886                | 0.888822  | -0.023311 |
| 2             | 6             | 0           | 1.945512                | -0.514144 | -0.008697 |
| 3             | 1             | 0           | 1.996537                | 1.808766  | 0.020224  |
| 4             | 6             | 0           | 0.684564                | -1.34475  | -0.359242 |
| 5             | 1             | 0           | 2.350199                | -0.777224 | 0.979948  |
| 6             | 1             | 0           | 2.757317                | -0.669697 | -0.728077 |
| 7             | 6             | 0           | -0.518253               | 0.44096   | -0.012187 |
| 8             | 1             | 0           | 0.679202                | -1.568874 | -1.430853 |
| 9             | 1             | 0           | 0.644463                | -2.29592  | 0.17878   |
| 10            | 7             | 0           | 0.122306                | 0.948072  | -0.027247 |
| 11            | 8             | 0           | -0.623017               | 1.979421  | 0.010307  |
| 12            | 6             | 0           | -1.058353               | 0.668944  | 1.406228  |
| 13            | 1             | 0           | -1.580347               | 1.630113  | 1.453779  |
| 14            | 1             | 0           | -0.24938                | 0.680003  | 2.144405  |
| 15            | 1             | 0           | -1.760165               | 0.125749  | 1.672917  |
| 16            | 6             | 0           | -1.639937               | 0.474162  | -1.047489 |
| 17            | 1             | 0           | -2.091215               | 1.471799  | -1.065875 |
| 18            | 1             | 0           | -2.409576               | 0.260653  | -0.800778 |
| 19            | 1             | 0           | -1.257554               | 0.248582  | -2.047998 |

**TS1**  
Standard orientation:

| Center Number | Atomic Number | Atomic Type | Coordinates (Angstroms) |           |           |
|---------------|---------------|-------------|-------------------------|-----------|-----------|
|               |               |             | X                       | Y         | Z         |
| 1             | 6             | 0           | -0.886503               | 0.622797  | 0.824372  |
| 2             | 6             | 0           | -0.318044               | 1.871753  | 0.213516  |
| 3             | 1             | 0           | -1.481719               | 0.606492  | 1.730469  |
| 4             | 6             | 0           | 0.683444                | 1.313473  | -0.827287 |
| 5             | 1             | 0           | 0.180495                | 2.470783  | 0.98613   |
| 6             | 1             | 0           | -1.096999               | 2.494057  | -0.235678 |
| 7             | 6             | 0           | 1.149291                | -0.054925 | -0.269747 |
| 8             | 1             | 0           | 0.171832                | 1.168459  | -1.783243 |
| 9             | 1             | 0           | 1.526832                | 1.987611  | -0.996931 |
| 10            | 7             | 0           | 0.034084                | -0.374548 | 0.697335  |
| 11            | 8             | 0           | -0.04969                | -1.506304 | 1.284434  |
| 12            | 6             | 0           | 2.452227                | 0.042192  | 0.53891   |

|    |   |   |           |           |           |
|----|---|---|-----------|-----------|-----------|
| 13 | 1 | 0 | 3.294723  | 0.227907  | -0.134783 |
| 14 | 1 | 0 | 2.410621  | 0.856319  | 1.27037   |
| 15 | 1 | 0 | 2.633543  | -0.893642 | 1.074894  |
| 16 | 8 | 0 | -2.259894 | 0.25692   | -0.315026 |
| 17 | 8 | 0 | -2.386705 | -0.983146 | -0.582212 |
| 18 | 6 | 0 | 1.23683   | -1.154517 | -1.330709 |
| 19 | 1 | 0 | 2.01694   | -0.902072 | -2.056345 |
| 20 | 1 | 0 | 1.485458  | -2.113136 | -0.868071 |
| 21 | 1 | 0 | 0.28653   | -1.265346 | -1.860093 |

### IN1

Standard orientation:

| Center Number | Atomic Number | Atomic Type | Coordinates (Angstroms) |           |           |
|---------------|---------------|-------------|-------------------------|-----------|-----------|
|               |               |             | X                       | Y         | Z         |
| 1             | 6             | 0           | 1.053725                | -0.06145  | -0.595441 |
| 2             | 6             | 0           | 0.716069                | 1.420633  | -0.555644 |
| 3             | 1             | 0           | 1.548386                | -0.4464   | -1.487144 |
| 4             | 6             | 0           | -0.478275               | 1.492475  | 0.421125  |
| 5             | 1             | 0           | 0.428109                | 1.741843  | -1.562524 |
| 6             | 1             | 0           | 1.576528                | 2.017487  | -0.245937 |
| 7             | 6             | 0           | -1.273426               | 0.184806  | 0.191504  |
| 8             | 1             | 0           | -0.112316               | 1.529032  | 1.452276  |
| 9             | 1             | 0           | -1.098254               | 2.377277  | 0.255269  |
| 10            | 7             | 0           | -0.199164               | 0.715298  | -0.347137 |
| 11            | 8             | 0           | -0.396424               | 1.94648   | -0.620674 |
| 12            | 6             | 0           | -2.365982               | 0.334193  | -0.881185 |
| 13            | 1             | 0           | -3.188744               | 0.943649  | -0.494148 |
| 14            | 1             | 0           | -1.978264               | 0.814079  | -1.785894 |
| 15            | 1             | 0           | -2.758694               | 0.648672  | -1.155975 |
| 16            | 8             | 0           | 1.961598                | -0.419088 | 0.546341  |
| 17            | 8             | 0           | 3.202423                | -0.050555 | 0.289546  |
| 18            | 6             | 0           | -1.848526               | 0.418764  | 1.476952  |
| 19            | 1             | 0           | -2.611006               | 0.247864  | 1.892867  |
| 20            | 1             | 0           | -2.309197               | 1.38844   | 1.269068  |
| 21            | 1             | 0           | -1.06469                | 0.563002  | 2.226534  |

### TS2

Standard orientation:

| Center Number | Atomic Number | Atomic Type | Coordinates (Angstroms) |           |           |
|---------------|---------------|-------------|-------------------------|-----------|-----------|
|               |               |             | X                       | Y         | Z         |
| 1             | 6             | 0           | -0.785698               | -0.681178 | 0.652206  |
| 2             | 6             | 0           | -1.914543               | -0.814085 | 1.665062  |
| 3             | 1             | 0           | 0.203185                | -0.402765 | 1.029053  |
| 4             | 6             | 0           | -3.183708               | -0.495733 | 0.844235  |
| 5             | 1             | 0           | -1.756215               | -0.080983 | 2.462282  |
| 6             | 1             | 0           | -1.932078               | -1.807871 | 2.118783  |
| 7             | 6             | 0           | -2.751025               | 0.581835  | -0.177996 |

|    |   |   |           |           |           |
|----|---|---|-----------|-----------|-----------|
| 8  | 1 | 0 | -3.51999  | -1.395938 | 0.320071  |
| 9  | 1 | 0 | -4.008706 | -0.147185 | 1.471615  |
| 10 | 7 | 0 | -1.276309 | 0.323064  | -0.274881 |
| 11 | 8 | 0 | -0.502809 | 1.04095   | -0.994189 |
| 12 | 6 | 0 | -2.962684 | 2.011979  | 0.348321  |
| 13 | 1 | 0 | -4.032002 | 2.244668  | 0.378498  |
| 14 | 1 | 0 | -2.555337 | 2.132472  | 1.357651  |
| 15 | 1 | 0 | -2.465711 | 2.730607  | -0.308987 |
| 16 | 8 | 0 | -0.667003 | -1.994731 | 0.01846   |
| 17 | 8 | 0 | 0.214294  | -1.966061 | -1.033578 |
| 18 | 8 | 0 | 2.459051  | -2.115411 | -0.272545 |
| 19 | 1 | 0 | 1.34977   | -2.074115 | -0.600568 |
| 20 | 7 | 0 | 3.039846  | -0.944107 | -0.518205 |
| 21 | 1 | 0 | 3.512836  | -0.862459 | -1.41294  |
| 22 | 6 | 0 | 2.926356  | 0.13753   | 0.336607  |
| 23 | 8 | 0 | 2.264787  | 0.075434  | 1.365104  |
| 24 | 6 | 0 | 3.693101  | 1.372746  | -0.105305 |
| 25 | 1 | 0 | 4.578763  | 1.442412  | 0.539454  |
| 26 | 1 | 0 | 4.058538  | 1.255596  | -1.132624 |
| 27 | 6 | 0 | 2.844557  | 2.645044  | 0.026481  |
| 28 | 1 | 0 | 2.512303  | 2.77312   | 1.059571  |
| 29 | 1 | 0 | 3.431549  | 3.521813  | -0.262788 |
| 30 | 1 | 0 | 1.956183  | 2.591278  | -0.60942  |
| 31 | 6 | 0 | -3.39311  | 0.408642  | -1.559138 |
| 32 | 1 | 0 | -4.47452  | 0.56864   | -1.492293 |
| 33 | 1 | 0 | -2.977119 | 1.133108  | -2.265097 |
| 34 | 1 | 0 | -3.212247 | -0.597213 | -1.949514 |

## IN2

Standard orientation:

| Center<br>Number | Atomic<br>Number | Atomic<br>Type | Coordinates (Angstroms) |           |           |
|------------------|------------------|----------------|-------------------------|-----------|-----------|
|                  |                  |                | X                       | Y         | Z         |
| 1                | 6                | 0              | 1.013467                | 0.575997  | -0.457797 |
| 2                | 6                | 0              | 0.208161                | 1.829275  | -0.110833 |
| 3                | 1                | 0              | 1.443258                | 0.559363  | -1.466028 |
| 4                | 6                | 0              | -1.267536               | 1.42636   | -0.323227 |
| 5                | 1                | 0              | 0.509046                | 2.685152  | -0.718347 |
| 6                | 1                | 0              | 0.40422                 | 2.078162  | 0.937163  |
| 7                | 6                | 0              | -1.349155               | 0.070217  | 0.05053   |
| 8                | 1                | 0              | -1.951067               | 2.031913  | 0.278083  |
| 9                | 1                | 0              | -1.546117               | 1.557781  | -1.374932 |
| 10               | 7                | 0              | 0.022263                | -0.516214 | -0.332547 |
| 11               | 8                | 0              | 0.40515                 | -1.73575  | -0.236376 |
| 12               | 6                | 0              | -2.387008               | 0.851975  | -0.75961  |
| 13               | 1                | 0              | -3.394904               | 0.505505  | -0.50908  |
| 14               | 1                | 0              | -2.229658               | 0.715804  | -1.834059 |
| 15               | 1                | 0              | -2.320159               | 1.919993  | -0.534735 |
| 16               | 8                | 0              | 2.055928                | 0.42064   | 0.48285   |

|    |   |   |           |           |           |
|----|---|---|-----------|-----------|-----------|
| 17 | 8 | 0 | 2.961162  | -0.60812  | -0.006188 |
| 18 | 6 | 0 | -1.552739 | 0.294235  | 1.561412  |
| 19 | 1 | 0 | -2.565842 | 0.005137  | 1.849647  |
| 20 | 1 | 0 | -1.419002 | 1.352246  | 1.803218  |
| 21 | 1 | 0 | -0.837798 | 0.283102  | 2.155118  |
| 22 | 1 | 0 | 2.383122  | -1.398949 | 0.056646  |

### TS3

Standard orientation:

| Center Number | Atomic Number | Atomic Type | Coordinates (Angstroms) |           |           |
|---------------|---------------|-------------|-------------------------|-----------|-----------|
|               |               |             | X                       | Y         | Z         |
| 1             | 6             | 0           | 1.034338                | 0.64785   | -0.130135 |
| 2             | 6             | 0           | 0.06158                 | 1.842681  | 0.09114   |
| 3             | 1             | 0           | 1.161905                | 0.533231  | -1.230933 |
| 4             | 6             | 0           | -1.252105               | 1.356421  | -0.545583 |
| 5             | 1             | 0           | 0.472973                | 2.734883  | -0.38312  |
| 6             | 1             | 0           | -0.035366               | 2.033647  | 1.164269  |
| 7             | 6             | 0           | -1.393961               | 0.126927  | -0.122119 |
| 8             | 1             | 0           | -2.117856               | 1.940796  | -0.222081 |
| 9             | 1             | 0           | -1.189781               | 1.435181  | -1.636649 |
| 10            | 7             | 0           | 0.042898                | -0.497131 | 0.142738  |
| 11            | 8             | 0           | 0.360692                | -1.549302 | 0.684824  |
| 12            | 6             | 0           | -1.966397               | 1.048942  | -1.205572 |
| 13            | 1             | 0           | -3.00143                | 0.762976  | -1.417747 |
| 14            | 1             | 0           | -1.390902               | 0.974469  | -2.132997 |
| 15            | 1             | 0           | -1.956536               | 2.089856  | -0.870141 |
| 16            | 8             | 0           | 2.151381                | 0.621448  | 0.526515  |
| 17            | 8             | 0           | 3.205532                | -0.755498 | -0.561976 |
| 18            | 6             | 0           | -2.165833               | 0.27908   | 1.200286  |
| 19            | 1             | 0           | -3.217713               | 0.031823  | 1.02773   |
| 20            | 1             | 0           | -2.099583               | 1.30633   | 1.566879  |
| 21            | 1             | 0           | -1.775425               | 0.389857  | 1.972795  |
| 22            | 1             | 0           | 3.202869                | -1.307415 | 0.239824  |

### Prod

Standard orientation:

| Center Number | Atomic Number | Atomic Type | Coordinates (Angstroms) |           |           |
|---------------|---------------|-------------|-------------------------|-----------|-----------|
|               |               |             | X                       | Y         | Z         |
| 1             | 6             | 0           | 2.201222                | -0.31374  | -0.350513 |
| 2             | 6             | 0           | 1.504716                | 1.033234  | -0.354124 |
| 3             | 1             | 0           | 1.965258                | -0.979946 | -1.207876 |
| 4             | 6             | 0           | 0.039836                | 1.03052   | -0.824738 |
| 5             | 1             | 0           | 2.076378                | 1.655295  | -1.060389 |
| 6             | 1             | 0           | 1.628626                | 1.490353  | 0.631688  |
| 7             | 6             | 0           | -0.999068               | 0.305731  | 0.073617  |
| 8             | 1             | 0           | -0.293656               | 2.070702  | -0.917138 |
| 9             | 1             | 0           | -0.021337               | 0.601693  | -1.834081 |

|    |   |   |           |           |           |
|----|---|---|-----------|-----------|-----------|
| 10 | 7 | 0 | -0.558648 | 1.140617  | 0.068628  |
| 11 | 8 | 0 | -1.414235 | 1.94772   | -0.211051 |
| 12 | 6 | 0 | -2.414683 | 0.500528  | -0.466227 |
| 13 | 1 | 0 | -2.690748 | 1.557752  | -0.403075 |
| 14 | 1 | 0 | -2.49037  | 0.186217  | -1.512005 |
| 15 | 1 | 0 | -3.139968 | 0.080976  | 0.108245  |
| 16 | 8 | 0 | 3.016498  | -0.648201 | 0.483475  |
| 17 | 6 | 0 | -0.888138 | 0.731315  | 1.551396  |
| 18 | 1 | 0 | -0.974803 | 1.820244  | 1.629314  |
| 19 | 1 | 0 | -1.694446 | 0.279321  | 2.136865  |
| 20 | 1 | 0 | 0.064191  | 0.425506  | 1.992203  |

### BMPO

Standard orientation:

| Center Number | Atomic Number | Atomic Type | Coordinates (Angstroms) |           |           |
|---------------|---------------|-------------|-------------------------|-----------|-----------|
|               |               |             | X                       | Y         | Z         |
| 1             | 6             | 0           | 3.124095                | 0.595691  | -0.618545 |
| 2             | 6             | 0           | 3.510994                | -0.78367  | -0.199784 |
| 3             | 1             | 0           | 3.733995                | 1.33447   | -1.122239 |
| 4             | 6             | 0           | 2.160377                | -1.407813 | 0.242414  |
| 5             | 1             | 0           | 4.243097                | -0.756442 | 0.62039   |
| 6             | 1             | 0           | 3.975621                | -1.350517 | -1.014461 |
| 7             | 6             | 0           | 1.213119                | -0.213033 | 0.485917  |
| 8             | 1             | 0           | 1.760962                | -2.026706 | -0.562865 |
| 9             | 1             | 0           | 2.258751                | -2.023219 | 1.140206  |
| 10            | 7             | 0           | 1.909324                | 0.918358  | -0.26532  |
| 11            | 8             | 0           | 1.295193                | 2.021848  | -0.424218 |
| 12            | 6             | 0           | 1.095443                | 0.204974  | 1.952319  |
| 13            | 1             | 0           | 0.536828                | -0.547116 | 2.515464  |
| 14            | 1             | 0           | 2.094754                | 0.297868  | 2.390217  |
| 15            | 1             | 0           | 0.579052                | 1.161897  | 2.037961  |
| 16            | 6             | 0           | -0.14262                | 0.410538  | -0.237122 |
| 17            | 8             | 0           | -0.207789               | 0.897876  | -1.348435 |
| 18            | 8             | 0           | -1.171868               | 0.001807  | 0.502696  |
| 19            | 6             | 0           | -2.567439               | 0.000533  | -0.012292 |
| 20            | 6             | 0           | -2.657669               | 0.891224  | -1.253693 |
| 21            | 6             | 0           | -3.013228               | 1.440501  | -0.283604 |
| 22            | 6             | 0           | -3.34794                | 0.604828  | 1.156046  |
| 23            | 1             | 0           | -2.240078               | 1.880097  | -1.043265 |
| 24            | 1             | 0           | -2.122039               | 0.457733  | -2.099114 |
| 25            | 1             | 0           | -3.710478               | 1.011593  | -1.530466 |
| 26            | 1             | 0           | -2.884847               | 2.057582  | 0.611879  |
| 27            | 1             | 0           | -4.07633                | 1.443472  | -0.546572 |
| 28            | 1             | 0           | -2.450292               | 1.883829  | -1.106061 |
| 29            | 1             | 0           | -4.411371               | 0.659326  | 0.903346  |
| 30            | 1             | 0           | -3.237137               | 0.007568  | 2.056178  |
| 31            | 1             | 0           | -2.990833               | 1.614944  | 1.376365  |



**TS1b**

Standard orientation:

| Center<br>Number | Atomic<br>Number | Atomic<br>Type | Coordinates (Angstroms) |           |           |
|------------------|------------------|----------------|-------------------------|-----------|-----------|
|                  |                  |                | X                       | Y         | Z         |
| 1                | 6                | 0              | 2.766543                | -0.126227 | -0.525596 |
| 2                | 6                | 0              | 3.178363                | 0.850171  | 0.535202  |
| 3                | 1                | 0              | 3.418262                | -0.46666  | -1.322215 |
| 4                | 6                | 0              | 1.828371                | 1.272884  | 1.164471  |
| 5                | 1                | 0              | 3.70553                 | 1.695296  | 0.074806  |
| 6                | 1                | 0              | 3.856327                | 0.394726  | 1.2626    |
| 7                | 6                | 0              | 0.769027                | 1.076513  | 0.057255  |
| 8                | 1                | 0              | 1.587034                | 0.621124  | 2.005558  |
| 9                | 1                | 0              | 1.841488                | 2.30602   | 1.519622  |
| 10               | 7                | 0              | 1.481813                | 0.141924  | -0.894536 |
| 11               | 8                | 0              | 0.907996                | -0.371354 | -1.913826 |
| 12               | 6                | 0              | 0.422267                | 2.361821  | -0.704635 |
| 13               | 1                | 0              | -0.152853               | 3.03569   | -0.062697 |
| 14               | 1                | 0              | 1.341297                | 2.873755  | -1.008188 |
| 15               | 1                | 0              | -0.169151               | 2.134265  | -1.592307 |
| 16               | 6                | 0              | -0.489866               | 0.342203  | 0.597748  |
| 17               | 8                | 0              | -0.489171               | -0.281072 | 1.640605  |
| 18               | 8                | 0              | -1.523389               | 0.49113   | -0.228638 |
| 19               | 6                | 0              | -2.81448                | -0.221954 | -0.023506 |
| 20               | 6                | 0              | -2.571685               | -1.733464 | -0.029386 |
| 21               | 6                | 0              | -3.470836               | 0.267862  | 1.270381  |
| 22               | 6                | 0              | -3.622384               | 0.208639  | -1.249033 |
| 23               | 1                | 0              | -2.022901               | -2.028141 | -0.928586 |
| 24               | 1                | 0              | -2.008885               | -2.054829 | 0.848006  |
| 25               | 1                | 0              | -3.538039               | -2.248861 | -0.031351 |
| 26               | 1                | 0              | -3.573756               | 1.358009  | 1.260309  |
| 27               | 1                | 0              | -4.473695               | -0.164961 | 1.350157  |
| 28               | 1                | 0              | -2.894146               | -0.027949 | 2.147926  |
| 29               | 1                | 0              | -4.613315               | -0.254957 | -1.220554 |
| 30               | 1                | 0              | -3.749514               | 1.295407  | -1.26878  |
| 31               | 1                | 0              | -3.118903               | -0.099671 | -2.169638 |
| 32               | 8                | 0              | 2.757662                | -1.709519 | 0.386277  |
| 33               | 8                | 0              | 1.874479                | -2.523239 | -0.029458 |

**IN1b**

Standard orientation:

| Center<br>Number | Atomic<br>Number | Atomic<br>Type | Coordinates (Angstroms) |           |           |
|------------------|------------------|----------------|-------------------------|-----------|-----------|
|                  |                  |                | X                       | Y         | Z         |
| 1                | 6                | 0              | 2.713552                | 0.048347  | 0.506276  |
| 2                | 6                | 0              | 2.978742                | -0.97549  | -0.584553 |
| 3                | 1                | 0              | 3.361397                | 0.028701  | 1.38276   |
| 4                | 6                | 0              | 1.600656                | -1.166809 | -1.255249 |
| 5                | 1                | 0              | 3.330784                | -1.901063 | -0.116028 |
| 6                | 1                | 0              | 3.753252                | -0.632116 | -1.273462 |

|    |   |   |           |           |           |
|----|---|---|-----------|-----------|-----------|
| 7  | 6 | 0 | 0.56941   | -1.001321 | -0.117594 |
| 8  | 1 | 0 | 1.432458  | -0.392351 | -2.006364 |
| 9  | 1 | 0 | 1.506083  | -2.142931 | -1.737222 |
| 10 | 7 | 0 | 1.337099  | -0.166182 | 0.867147  |
| 11 | 8 | 0 | 0.846737  | 0.243746  | 1.970448  |
| 12 | 6 | 0 | 0.171033  | -2.324542 | 0.549155  |
| 13 | 1 | 0 | -0.45733  | -2.913375 | -0.125308 |
| 14 | 1 | 0 | 1.067243  | -2.907334 | 0.785204  |
| 15 | 1 | 0 | -0.383817 | -2.13837  | 1.469527  |
| 16 | 6 | 0 | -0.653248 | -0.160057 | -0.580847 |
| 17 | 8 | 0 | -0.594141 | 0.626383  | -1.505038 |
| 18 | 8 | 0 | -1.72349  | -0.404582 | 0.175118  |
| 19 | 6 | 0 | -2.992336 | 0.361501  | 0.028281  |
| 20 | 6 | 0 | -2.72585  | 1.846149  | 0.290064  |
| 21 | 6 | 0 | -3.592794 | 0.102829  | -1.356391 |
| 22 | 6 | 0 | -3.866323 | -0.241727 | 1.129244  |
| 23 | 1 | 0 | -2.229153 | 1.979847  | 1.255705  |
| 24 | 1 | 0 | -2.105731 | 2.287143  | -0.491551 |
| 25 | 1 | 0 | -3.681316 | 2.380397  | 0.318892  |
| 26 | 1 | 0 | -3.708408 | -0.97204  | -1.53034  |
| 27 | 1 | 0 | -4.58606  | 0.561225  | -1.407324 |
| 28 | 1 | 0 | -2.973173 | 0.527598  | -2.147333 |
| 29 | 1 | 0 | -4.847431 | 0.243102  | 1.130942  |
| 30 | 1 | 0 | -4.011013 | -1.314193 | 0.966904  |
| 31 | 1 | 0 | -3.405113 | -0.097523 | 2.110449  |
| 32 | 8 | 0 | 2.813148  | 1.440125  | -0.030327 |
| 33 | 8 | 0 | 4.077818  | 1.798488  | -0.148426 |

### TS2b

Standard orientation:

| Center Number | Atomic Number | Atomic Type | Coordinates (Angstroms) |           |           |
|---------------|---------------|-------------|-------------------------|-----------|-----------|
|               |               |             | X                       | Y         | Z         |
| 1             | 6             | 0           | 0.713764                | -0.631177 | -1.275814 |
| 2             | 6             | 0           | 0.094474                | -1.614888 | -2.258255 |
| 3             | 1             | 0           | 1.791326                | -0.70789  | -1.100587 |
| 4             | 6             | 0           | -1.358878               | -1.780839 | -1.759025 |
| 5             | 1             | 0           | 0.646567                | -2.558077 | -2.204659 |
| 6             | 1             | 0           | 0.15198                 | -1.24644  | -3.285125 |
| 7             | 6             | 0           | -1.257549               | -1.681355 | -0.213674 |
| 8             | 1             | 0           | -1.977525               | -0.969853 | -2.151153 |
| 9             | 1             | 0           | -1.802236               | -2.73152  | -2.06416  |
| 10            | 7             | 0           | -0.010007               | -0.884384 | -0.039503 |
| 11            | 8             | 0           | 0.455218                | -0.596968 | 1.112955  |
| 12            | 6             | 0           | -1.100343               | -3.044078 | 0.469971  |
| 13            | 1             | 0           | -2.036001               | -3.602568 | 0.40502   |
| 14            | 1             | 0           | -0.301712               | -3.616438 | -0.011752 |
| 15            | 1             | 0           | -0.849361               | -2.909796 | 1.524388  |
| 16            | 8             | 0           | 0.442635                | 0.697923  | -1.811604 |

|    |   |   |           |           |           |
|----|---|---|-----------|-----------|-----------|
| 17 | 8 | 0 | 0.863907  | 1.678955  | -0.949051 |
| 18 | 8 | 0 | 3.194418  | 2.066841  | -1.189001 |
| 19 | 1 | 0 | 2.055045  | 1.864369  | -1.124778 |
| 20 | 7 | 0 | 3.778269  | 1.689669  | -0.054884 |
| 21 | 1 | 0 | 3.903925  | 2.416866  | 0.642462  |
| 22 | 6 | 0 | 4.1044    | 0.372026  | 0.212421  |
| 23 | 8 | 0 | 3.855143  | -0.523761 | -0.584445 |
| 24 | 6 | 0 | 4.792151  | 0.151766  | 1.549111  |
| 25 | 1 | 0 | 5.847648  | -0.055478 | 1.330935  |
| 26 | 1 | 0 | 4.767808  | 1.066408  | 2.153707  |
| 27 | 6 | 0 | 4.173839  | -1.023657 | 2.319432  |
| 28 | 1 | 0 | 4.230985  | -1.938484 | 1.724631  |
| 29 | 1 | 0 | 4.711677  | -1.183952 | 3.258521  |
| 30 | 1 | 0 | 3.12065   | -0.834762 | 2.547035  |
| 31 | 6 | 0 | -2.462814 | -0.920639 | 0.387473  |
| 32 | 8 | 0 | -3.325788 | -1.467801 | 1.045076  |
| 33 | 8 | 0 | -2.425207 | 0.369522  | 0.048824  |
| 34 | 6 | 0 | -3.427037 | 1.356019  | 0.527758  |
| 35 | 6 | 0 | -4.814922 | 0.988552  | -0.005598 |
| 36 | 6 | 0 | -3.383413 | 1.422579  | 2.057076  |
| 37 | 6 | 0 | -2.924439 | 2.659836  | -0.094676 |
| 38 | 1 | 0 | -4.791957 | 0.886856  | -1.095605 |
| 39 | 1 | 0 | -5.179813 | 0.058     | 0.431755  |
| 40 | 1 | 0 | -5.518247 | 1.79062   | 0.242495  |
| 41 | 1 | 0 | -2.362884 | 1.618068  | 2.400083  |
| 42 | 1 | 0 | -4.022872 | 2.243184  | 2.39921   |
| 43 | 1 | 0 | -3.737754 | 0.494706  | 2.508969  |
| 44 | 1 | 0 | -3.572665 | 3.488705  | 0.20672   |
| 45 | 1 | 0 | -1.90249  | 2.873034  | 0.230102  |
| 46 | 1 | 0 | -2.927941 | 2.59489   | -1.186745 |

### IN2b

Standard orientation:

| Center<br>Number | Atomic<br>Number | Atomic<br>Type | Coordinates (Angstroms) |           |           |
|------------------|------------------|----------------|-------------------------|-----------|-----------|
|                  |                  |                | X                       | Y         | Z         |
| 1                | 6                | 0              | 2.418514                | 0.688126  | -0.0284   |
| 2                | 6                | 0              | 2.735154                | -0.200797 | -1.230657 |
| 3                | 1                | 0              | 3.254048                | 0.950946  | 0.626888  |
| 4                | 6                | 0              | 1.431637                | -0.99932  | -1.455699 |
| 5                | 1                | 0              | 3.566181                | -0.863337 | -0.969035 |
| 6                | 1                | 0              | 3.028348                | 0.387534  | -2.103265 |
| 7                | 6                | 0              | 0.876363                | -1.252907 | -0.028761 |
| 8                | 1                | 0              | 0.728589                | -0.397361 | -2.036474 |
| 9                | 1                | 0              | 1.602013                | -1.939787 | -1.984996 |
| 10               | 7                | 0              | 1.472107                | -0.122776 | 0.736081  |
| 11               | 8                | 0              | 1.334604                | -0.015178 | 1.999919  |
| 12               | 6                | 0              | 1.340361                | -2.586631 | 0.568646  |
| 13               | 1                | 0              | 0.842694                | -3.415008 | 0.061113  |

|    |   |   |           |           |           |
|----|---|---|-----------|-----------|-----------|
| 14 | 1 | 0 | 2.424254  | -2.692226 | 0.458768  |
| 15 | 1 | 0 | 1.091266  | -2.62901  | 1.631131  |
| 16 | 6 | 0 | -0.667769 | 1.169545  | -0.000417 |
| 17 | 8 | 0 | -1.377488 | 2.149446  | 0.116486  |
| 18 | 8 | 0 | -1.078932 | 0.089411  | -0.159396 |
| 19 | 6 | 0 | -2.510746 | 0.479268  | -0.112616 |
| 20 | 6 | 0 | -3.26821  | 0.184688  | -1.266354 |
| 21 | 6 | 0 | -3.090261 | 0.117817  | 1.257958  |
| 22 | 6 | 0 | -2.442176 | 1.996341  | -0.297965 |
| 23 | 1 | 0 | -2.784031 | 0.041499  | -2.222165 |
| 24 | 1 | 0 | -3.320983 | 1.267203  | -1.140979 |
| 25 | 1 | 0 | -4.287824 | 0.213566  | -1.303006 |
| 26 | 1 | 0 | -2.481135 | 0.55507   | 2.054858  |
| 27 | 1 | 0 | -4.103825 | 0.524902  | 1.338864  |
| 28 | 1 | 0 | -3.137664 | 0.963032  | 1.399984  |
| 29 | 1 | 0 | -3.450512 | 2.42068   | -0.260838 |
| 30 | 1 | 0 | -1.836171 | 2.453027  | 0.489104  |
| 31 | 1 | 0 | -1.993379 | 2.248596  | -1.263327 |
| 32 | 8 | 0 | 1.842342  | 1.875217  | -0.575    |
| 33 | 8 | 0 | 1.469745  | 2.752561  | 0.524646  |
| 34 | 1 | 0 | 2.094014  | 3.484055  | 0.383148  |

### TS3b

Standard orientation:

| Center Number | Atomic Number | Atomic Type | Coordinates (Angstroms) |           |           |
|---------------|---------------|-------------|-------------------------|-----------|-----------|
|               |               |             | X                       | Y         | Z         |
| 1             | 6             | 0           | -2.256531               | -0.432108 | -0.623402 |
| 2             | 6             | 0           | -1.416665               | -0.045746 | -1.873276 |
| 3             | 1             | 0           | -3.127204               | 0.265398  | -0.590689 |
| 4             | 6             | 0           | -0.920061               | 1.375083  | -1.553115 |
| 5             | 1             | 0           | -2.051094               | -0.087221 | -2.759909 |
| 6             | 1             | 0           | -0.595597               | -0.756525 | -1.986    |
| 7             | 6             | 0           | -0.568647               | 1.370874  | -0.036572 |
| 8             | 1             | 0           | -0.061026               | 1.670912  | -2.160554 |
| 9             | 1             | 0           | -1.714234               | 2.107968  | -1.730592 |
| 10            | 7             | 0           | -1.384899               | 0.222664  | 0.463645  |
| 11            | 8             | 0           | -1.286734               | -0.204284 | 1.608379  |
| 12            | 6             | 0           | -0.930545               | 2.651861  | 0.716838  |
| 13            | 1             | 0           | -0.315395               | 3.474972  | 0.347796  |
| 14            | 1             | 0           | -1.986556               | 2.890089  | 0.563446  |
| 15            | 1             | 0           | -0.74117                | 2.535481  | 1.786443  |
| 16            | 8             | 0           | -2.591981               | -1.668686 | -0.437805 |
| 17            | 8             | 0           | -4.15821                | -1.453341 | 0.896937  |
| 18            | 1             | 0           | -3.572582               | -1.876039 | 1.549965  |
| 19            | 6             | 0           | 0.937862                | 1.044356  | 0.158817  |
| 20            | 8             | 0           | 1.746125                | 1.895718  | 0.460992  |
| 21            | 8             | 0           | 1.18682                 | -0.238236 | -0.104945 |
| 22            | 6             | 0           | 2.549866                | -0.838385 | 0.024     |

|    |   |   |          |           |           |
|----|---|---|----------|-----------|-----------|
| 23 | 6 | 0 | 3.496771 | -0.173875 | -0.977812 |
| 24 | 6 | 0 | 3.027457 | -0.701775 | 1.471681  |
| 25 | 6 | 0 | 2.29605  | -2.302501 | -0.336775 |
| 26 | 1 | 0 | 3.093396 | -0.242128 | -1.993367 |
| 27 | 1 | 0 | 3.671571 | 0.87466   | -0.731758 |
| 28 | 1 | 0 | 4.457544 | -0.698804 | -0.962789 |
| 29 | 1 | 0 | 2.284896 | -1.116377 | 2.160076  |
| 30 | 1 | 0 | 3.957081 | -1.267029 | 1.593975  |
| 31 | 1 | 0 | 3.218962 | 0.338984  | 1.737568  |
| 32 | 1 | 0 | 3.230612 | -2.866671 | -0.262015 |
| 33 | 1 | 0 | 1.564016 | -2.748506 | 0.342038  |
| 34 | 1 | 0 | 1.919578 | -2.393878 | -1.359915 |

**Prodb**

Standard orientation:

| Center<br>Number | Atomic<br>Number | Atomic<br>Type | Coordinates (Angstroms) |           |           |
|------------------|------------------|----------------|-------------------------|-----------|-----------|
|                  |                  |                | X                       | Y         | Z         |
| 1                | 6                | 0              | 2.921646                | -1.477971 | -0.304925 |
| 2                | 6                | 0              | 2.442777                | -0.881009 | 1.003849  |
| 3                | 1                | 0              | 3.597227                | -0.835622 | -0.911211 |
| 4                | 6                | 0              | 2.173829                | 0.633377  | 0.998581  |
| 5                | 1                | 0              | 3.254304                | -1.068696 | 1.723825  |
| 6                | 1                | 0              | 1.579664                | -1.450836 | 1.358735  |
| 7                | 6                | 0              | 0.948509                | 1.116758  | 0.184845  |
| 8                | 1                | 0              | 2.011669                | 0.960673  | 2.029579  |
| 9                | 1                | 0              | 3.054507                | 1.172206  | 0.625523  |
| 10               | 7                | 0              | 1.211123                | 0.649082  | -1.23232  |
| 11               | 8                | 0              | 1.176387                | 1.515132  | -2.072881 |
| 12               | 6                | 0              | 0.749759                | 2.631775  | 0.298134  |
| 13               | 1                | 0              | 0.553238                | 2.898017  | 1.339958  |
| 14               | 1                | 0              | 1.648456                | 3.156954  | -0.037809 |
| 15               | 1                | 0              | -0.08545                | 2.968718  | -0.320164 |
| 16               | 8                | 0              | 2.659462                | -2.605796 | -0.667097 |
| 17               | 6                | 0              | -0.332787               | 0.409603  | 0.68189   |
| 18               | 8                | 0              | -0.529033               | 0.16564   | 1.855243  |
| 19               | 8                | 0              | -1.170643               | 0.180478  | -0.330277 |
| 20               | 6                | 0              | -2.502969               | -0.465296 | -0.147019 |
| 21               | 6                | 0              | -2.314531               | -1.872575 | 0.425149  |
| 22               | 6                | 0              | -3.380254               | 0.42223   | 0.739467  |
| 23               | 6                | 0              | -3.037093               | -0.519701 | -1.578967 |
| 24               | 1                | 0              | -1.618516               | -2.447964 | -0.192885 |
| 25               | 1                | 0              | -1.941734               | -1.844319 | 1.450156  |
| 26               | 1                | 0              | -3.279323               | -2.390323 | 0.421419  |
| 27               | 1                | 0              | -3.440267               | 1.435465  | 0.329287  |
| 28               | 1                | 0              | -4.393955               | 0.009198  | 0.76767   |
| 29               | 1                | 0              | -2.997833               | 0.472414  | 1.760138  |
| 30               | 1                | 0              | -4.029039               | -0.981744 | -1.585214 |
| 31               | 1                | 0              | -3.119704               | 0.485924  | -2.00162  |

|    |   |   |           |           |          |
|----|---|---|-----------|-----------|----------|
| 32 | 1 | 0 | -2.373809 | -1.110414 | -2.21707 |
|----|---|---|-----------|-----------|----------|

### DEPMPO

Standard orientation:

| Center Number | Atomic Number | Atomic Type | Coordinates (Angstroms) |           |           |
|---------------|---------------|-------------|-------------------------|-----------|-----------|
|               |               |             | X                       | Y         | Z         |
| 1             | 6             | 0           | -2.156426               | -0.843641 | -1.487408 |
| 2             | 6             | 0           | -2.90074                | 0.140651  | -0.644974 |
| 3             | 1             | 0           | -2.336171               | -1.109039 | -2.521058 |
| 4             | 6             | 0           | -2.373433               | -0.163364 | 0.77978   |
| 5             | 1             | 0           | -3.986036               | 0.008389  | -0.718757 |
| 6             | 1             | 0           | -2.675728               | 1.171102  | -0.947228 |
| 7             | 6             | 0           | -1.02881                | -0.899162 | 0.568589  |
| 8             | 1             | 0           | -2.271894               | 0.733653  | 1.39265   |
| 9             | 1             | 0           | -3.058654               | -0.844745 | 1.294969  |
| 10            | 7             | 0           | -1.164188               | -1.413885 | -0.855336 |
| 11            | 8             | 0           | -0.352822               | -2.29777  | -1.285701 |
| 12            | 6             | 0           | -0.807011               | -2.078121 | 1.517465  |
| 13            | 1             | 0           | -0.699528               | -1.709948 | 2.539831  |
| 14            | 1             | 0           | -1.66492                | -2.756095 | 1.461519  |
| 15            | 1             | 0           | 0.086979                | -2.643498 | 1.248018  |
| 16            | 15            | 0           | 0.427888                | 0.274048  | 0.696353  |
| 17            | 8             | 0           | 0.888431                | 0.425124  | 2.105751  |
| 18            | 8             | 0           | 1.566251                | -0.146168 | -0.361545 |
| 19            | 8             | 0           | -0.164734               | 1.593506  | -0.023954 |
| 20            | 6             | 0           | 2.529253                | -1.205121 | -0.092865 |
| 21            | 1             | 0           | 2.790253                | -1.182241 | 0.970068  |
| 22            | 1             | 0           | 2.040936                | -2.151998 | -0.339199 |
| 23            | 6             | 0           | 3.744543                | -0.966573 | -0.968647 |
| 24            | 1             | 0           | 4.473304                | -1.769013 | -0.80972  |
| 25            | 1             | 0           | 3.462975                | -0.961846 | -2.025742 |
| 26            | 1             | 0           | 4.223369                | -0.012579 | -0.727175 |
| 27            | 6             | 0           | 0.654819                | 2.791647  | -0.12799  |
| 28            | 1             | 0           | 1.071164                | 3.018322  | 0.858814  |
| 29            | 1             | 0           | 1.475922                | 2.584907  | -0.821708 |
| 30            | 6             | 0           | -0.224863               | 3.920694  | -0.630332 |
| 31            | 1             | 0           | -0.647055               | 3.68026   | -1.610841 |
| 32            | 1             | 0           | -1.045349               | 4.116264  | 0.066583  |
| 33            | 1             | 0           | 0.370425                | 4.834993  | -0.727088 |

### TS1d

Standard orientation:

| Center Number | Atomic Number | Atomic Type | Coordinates (Angstroms) |           |           |
|---------------|---------------|-------------|-------------------------|-----------|-----------|
|               |               |             | X                       | Y         | Z         |
| 1             | 6             | 0           | 2.428582                | -0.562384 | 0.665538  |
| 2             | 6             | 0           | 2.812193                | 0.28933   | -0.503672 |
| 3             | 1             | 0           | 3.143498                | -1.03134  | 1.332031  |

|    |    |   |           |           |           |
|----|----|---|-----------|-----------|-----------|
| 4  | 6  | 0 | 1.865301  | -0.155467 | -1.651994 |
| 5  | 1  | 0 | 3.866283  | 0.158574  | -0.763435 |
| 6  | 1  | 0 | 2.672941  | 1.343231  | -0.228555 |
| 7  | 6  | 0 | 0.73029   | -0.974463 | -0.984933 |
| 8  | 1  | 0 | 1.486338  | 0.692953  | -2.223516 |
| 9  | 1  | 0 | 2.397221  | -0.812869 | -2.346981 |
| 10 | 7  | 0 | 1.35929   | -1.353554 | 0.319999  |
| 11 | 8  | 0 | 0.89913   | -2.290722 | 1.053339  |
| 12 | 6  | 0 | 0.350903  | -2.243005 | -1.75726  |
| 13 | 1  | 0 | -0.090923 | -1.968126 | -2.717043 |
| 14 | 1  | 0 | 1.246703  | -2.84892  | -1.927113 |
| 15 | 1  | 0 | -0.367758 | -2.849105 | -1.201646 |
| 16 | 8  | 0 | 1.809391  | 0.559863  | 1.982969  |
| 17 | 8  | 0 | 2.170377  | 1.770683  | 1.841903  |
| 18 | 15 | 0 | -0.815378 | 0.058879  | -0.728911 |
| 19 | 8  | 0 | -1.690943 | 0.054385  | -1.934963 |
| 20 | 8  | 0 | -0.160563 | 1.450584  | -0.268198 |
| 21 | 8  | 0 | -1.529603 | -0.420454 | 0.635044  |
| 22 | 6  | 0 | -0.931439 | 2.548201  | 0.302031  |
| 23 | 1  | 0 | -0.233719 | 3.041646  | 0.982261  |
| 24 | 1  | 0 | -1.752785 | 2.133279  | 0.893278  |
| 25 | 6  | 0 | -1.428414 | 3.491246  | -0.780998 |
| 26 | 1  | 0 | -2.111007 | 2.980562  | -1.465746 |
| 27 | 1  | 0 | -1.960039 | 4.330257  | -0.317514 |
| 28 | 1  | 0 | -0.591267 | 3.894021  | -1.359276 |
| 29 | 6  | 0 | -2.514416 | -1.491145 | 0.666073  |
| 30 | 1  | 0 | -3.047486 | -1.510455 | -0.28936  |
| 31 | 1  | 0 | -1.967906 | -2.429688 | 0.801353  |
| 32 | 6  | 0 | -3.456977 | -1.234808 | 1.826914  |
| 33 | 1  | 0 | -2.904831 | -1.182514 | 2.769758  |
| 34 | 1  | 0 | -4.004607 | -0.297695 | 1.687834  |
| 35 | 1  | 0 | -4.183456 | -2.051857 | 1.896393  |

### IN1d

Standard orientation:

| Center<br>Number | Atomic<br>Number | Atomic<br>Type | Coordinates (Angstroms) |           |           |
|------------------|------------------|----------------|-------------------------|-----------|-----------|
|                  |                  |                | X                       | Y         | Z         |
| 1                | 6                | 0              | -2.548561               | -0.313793 | -0.234971 |
| 2                | 6                | 0              | -2.507932               | 0.692332  | 0.916593  |
| 3                | 1                | 0              | -3.456326               | -0.912504 | -0.335273 |
| 4                | 6                | 0              | -1.504828               | 0.105915  | 1.937021  |
| 5                | 1                | 0              | -3.499869               | 0.843699  | 1.347436  |
| 6                | 1                | 0              | -2.150175               | 1.647504  | 0.527911  |
| 7                | 6                | 0              | -0.544591               | -0.794469 | 1.122842  |
| 8                | 1                | 0              | -0.979838               | 0.885327  | 2.493767  |
| 9                | 1                | 0              | -2.024089               | -0.526355 | 2.665491  |
| 10               | 7                | 0              | -1.391345               | -1.158806 | -0.041098 |
| 11               | 8                | 0              | -1.191494               | -2.193065 | -0.759419 |

|    |    |   |           |           |           |
|----|----|---|-----------|-----------|-----------|
| 12 | 6  | 0 | -0.100875 | -2.054331 | 1.875556  |
| 13 | 1  | 0 | 0.515529  | -1.773397 | 2.732239  |
| 14 | 1  | 0 | -0.982819 | -2.59978  | 2.225977  |
| 15 | 1  | 0 | 0.47089   | -2.723835 | 1.229373  |
| 16 | 8  | 0 | -2.402661 | 0.371105  | -1.541273 |
| 17 | 8  | 0 | -3.574638 | 0.535392  | -2.128384 |
| 18 | 15 | 0 | 0.989693  | 0.14038   | 0.586348  |
| 19 | 8  | 0 | 1.974773  | 0.313408  | 1.69243   |
| 20 | 8  | 0 | 0.326978  | 1.463141  | -0.047192 |
| 21 | 8  | 0 | 1.574776  | -0.586073 | -0.730858 |
| 22 | 6  | 0 | 1.1175    | 2.475533  | -0.735914 |
| 23 | 1  | 0 | 0.455634  | 2.856011  | -1.517704 |
| 24 | 1  | 0 | 1.972827  | 1.993338  | -1.218441 |
| 25 | 6  | 0 | 1.550981  | 3.574331  | 0.220115  |
| 26 | 1  | 0 | 2.199377  | 3.177017  | 1.005633  |
| 27 | 1  | 0 | 2.101656  | 4.343722  | -0.333046 |
| 28 | 1  | 0 | 0.682061  | 4.046648  | 0.688704  |
| 29 | 6  | 0 | 2.624578  | -1.590884 | -0.668877 |
| 30 | 1  | 0 | 3.205313  | -1.442368 | 0.246295  |
| 31 | 1  | 0 | 2.135265  | -2.569781 | -0.635082 |
| 32 | 6  | 0 | 3.489292  | -1.457779 | -1.908583 |
| 33 | 1  | 0 | 2.887149  | -1.567351 | -2.815202 |
| 34 | 1  | 0 | 3.989402  | -0.484809 | -1.934737 |
| 35 | 1  | 0 | 4.256779  | -2.239532 | -1.906004 |

### TS2d

Standard orientation:

| Center<br>Number | Atomic<br>Number | Atomic<br>Type | Coordinates (Angstroms) |           |           |
|------------------|------------------|----------------|-------------------------|-----------|-----------|
|                  |                  |                | X                       | Y         | Z         |
| 1                | 6                | 0              | 0.970951                | -1.086231 | 1.173931  |
| 2                | 6                | 0              | 0.355019                | -1.516856 | 2.496306  |
| 3                | 1                | 0              | 2.033787                | -0.824132 | 1.181122  |
| 4                | 6                | 0              | -1.127086               | -1.092184 | 2.382186  |
| 5                | 1                | 0              | 0.865417                | -0.98475  | 3.30515   |
| 6                | 1                | 0              | 0.476452                | -2.58911  | 2.667501  |
| 7                | 6                | 0              | -1.104295               | 0.202418  | 1.523159  |
| 8                | 1                | 0              | -1.697856               | -1.880434 | 1.887666  |
| 9                | 1                | 0              | -1.586883               | -0.902375 | 3.354185  |
| 10               | 7                | 0              | 0.188212                | 0.082299  | 0.79078   |
| 11               | 8                | 0              | 0.692667                | 1.050284  | 0.126723  |
| 12               | 6                | 0              | -1.100911               | 1.484788  | 2.373752  |
| 13               | 1                | 0              | -2.077327               | 1.624844  | 2.843513  |
| 14               | 1                | 0              | -0.337424               | 1.410016  | 3.155218  |
| 15               | 1                | 0              | -0.866852               | 2.355681  | 1.75694   |
| 16               | 8                | 0              | 0.788746                | -2.198582 | 0.252699  |
| 17               | 8                | 0              | 1.117244                | -1.842992 | -1.03147  |
| 18               | 8                | 0              | 3.468172                | -1.825017 | -1.37514  |
| 19               | 1                | 0              | 2.334432                | -1.880677 | -1.164396 |



|    |    |   |           |           |           |
|----|----|---|-----------|-----------|-----------|
| 20 | 7  | 0 | 3.82688   | -0.550484 | -1.509657 |
| 21 | 1  | 0 | 3.805717  | -0.181485 | -2.455749 |
| 22 | 6  | 0 | 4.052692  | 0.278194  | -0.42411  |
| 23 | 8  | 0 | 3.990069  | -0.140056 | 0.724669  |
| 24 | 6  | 0 | 4.338397  | 1.723707  | -0.791548 |
| 25 | 1  | 0 | 4.658583  | 1.799224  | -1.838092 |
| 26 | 1  | 0 | 3.375479  | 2.246145  | -0.715173 |
| 27 | 6  | 0 | 5.367137  | 2.371965  | 0.141007  |
| 28 | 1  | 0 | 6.347585  | 1.895024  | 0.043092  |
| 29 | 1  | 0 | 5.478113  | 3.433814  | -0.097384 |
| 30 | 1  | 0 | 5.049928  | 2.278995  | 1.182234  |
| 31 | 15 | 0 | -2.561407 | 0.241749  | 0.359362  |
| 32 | 8  | 0 | -3.849672 | 0.447834  | 1.082769  |
| 33 | 8  | 0 | -2.344322 | -1.141371 | -0.425695 |
| 34 | 8  | 0 | -2.271369 | 1.327808  | -0.802294 |
| 35 | 6  | 0 | -3.132403 | -1.508226 | -1.589725 |
| 36 | 1  | 0 | -4.192666 | -1.492993 | -1.314883 |
| 37 | 1  | 0 | -2.95509  | -0.762197 | -2.370721 |
| 38 | 6  | 0 | -2.687853 | -2.889621 | -2.031285 |
| 39 | 1  | 0 | -3.240689 | -3.183348 | -2.930293 |
| 40 | 1  | 0 | -1.617978 | -2.89462  | -2.257671 |
| 41 | 1  | 0 | -2.880935 | -3.630114 | -1.249381 |
| 42 | 6  | 0 | -2.788408 | 2.68252   | -0.743321 |
| 43 | 1  | 0 | -2.000399 | 3.31652   | -0.322445 |
| 44 | 1  | 0 | -3.659632 | 2.704317  | -0.082055 |
| 45 | 6  | 0 | -3.145815 | 3.123841  | -2.151097 |
| 46 | 1  | 0 | -3.494059 | 4.162577  | -2.134623 |
| 47 | 1  | 0 | -2.275281 | 3.061232  | -2.810935 |
| 48 | 1  | 0 | -3.943806 | 2.499774  | -2.564723 |

### IN2d

Standard orientation:

| Center<br>Number | Atomic<br>Number | Atomic<br>Type | Coordinates (Angstroms) |           |           |
|------------------|------------------|----------------|-------------------------|-----------|-----------|
|                  |                  |                | X                       | Y         | Z         |
| 1                | 6                | 0              | -2.549018               | -0.216034 | -0.113699 |
| 2                | 6                | 0              | -2.401858               | 0.890332  | 0.928523  |
| 3                | 1                | 0              | -3.434297               | -0.852773 | 0.002521  |
| 4                | 6                | 0              | -1.444481               | 0.312709  | 1.994447  |
| 5                | 1                | 0              | -3.368702               | 1.178228  | 1.346089  |
| 6                | 1                | 0              | -1.956156               | 1.760595  | 0.442472  |
| 7                | 6                | 0              | -0.503293               | -0.661881 | 1.240961  |
| 8                | 1                | 0              | -0.897781               | 1.094602  | 2.525698  |
| 9                | 1                | 0              | -2.004263               | -0.262911 | 2.740319  |
| 10               | 7                | 0              | -1.341658               | -1.04426  | 0.087383  |
| 11               | 8                | 0              | -1.056638               | -2.003852 | -0.711343 |
| 12               | 6                | 0              | -0.116458               | -1.902049 | 2.060362  |
| 13               | 1                | 0              | 0.507351                | -1.609648 | 2.907478  |
| 14               | 1                | 0              | -1.023935               | -2.3924   | 2.426893  |

|    |    |   |           |           |           |
|----|----|---|-----------|-----------|-----------|
| 15 | 1  | 0 | 0.432887  | -2.623382 | 1.450869  |
| 16 | 8  | 0 | -2.564413 | 0.346285  | -1.407896 |
| 17 | 8  | 0 | -2.987276 | -0.683262 | -2.345508 |
| 18 | 1  | 0 | -2.225121 | -1.297935 | -2.303148 |
| 19 | 15 | 0 | 1.082506  | 0.19452   | 0.702515  |
| 20 | 8  | 0 | 2.083381  | 0.275075  | 1.804896  |
| 21 | 8  | 0 | 0.515275  | 1.584043  | 0.116991  |
| 22 | 8  | 0 | 1.611136  | -0.514282 | -0.647749 |
| 23 | 6  | 0 | 1.417382  | 2.56523   | -0.470453 |
| 24 | 1  | 0 | 2.195497  | 2.803775  | 0.261758  |
| 25 | 1  | 0 | 1.882314  | 2.115934  | -1.353407 |
| 26 | 6  | 0 | 2.513124  | -1.653841 | -0.632431 |
| 27 | 1  | 0 | 3.130084  | -1.607702 | 0.270216  |
| 28 | 1  | 0 | 1.896143  | -2.557856 | -0.608503 |
| 29 | 6  | 0 | 3.361327  | -1.605949 | -1.889747 |
| 30 | 1  | 0 | 3.982064  | -0.705082 | -1.908976 |
| 31 | 1  | 0 | 4.020505  | -2.480371 | -1.9217   |
| 32 | 1  | 0 | 2.730436  | -1.616297 | -2.78344  |
| 33 | 6  | 0 | 0.601255  | 3.789511  | -0.837907 |
| 34 | 1  | 0 | 0.137703  | 4.231731  | 0.049217  |
| 35 | 1  | 0 | 1.254015  | 4.541011  | -1.294873 |
| 36 | 1  | 0 | -0.184315 | 3.532274  | -1.554352 |

### TS3d

Standard orientation:

| Center Number | Atomic Number | Atomic Type | Coordinates (Angstroms) |           |           |
|---------------|---------------|-------------|-------------------------|-----------|-----------|
|               |               |             | X                       | Y         | Z         |
| 1             | 6             | 0           | -2.67386                | -0.047557 | 0.141063  |
| 2             | 6             | 0           | -2.210385               | 0.487752  | 1.52126   |
| 3             | 1             | 0           | -3.253032               | -0.98271  | 0.331686  |
| 4             | 6             | 0           | -1.234479               | -0.593208 | 2.017512  |
| 5             | 1             | 0           | -3.07711                | 0.60908   | 2.172641  |
| 6             | 1             | 0           | -1.722617               | 1.454838  | 1.387185  |
| 7             | 6             | 0           | -0.429285               | -1.040535 | 0.76781   |
| 8             | 1             | 0           | -0.57252                | -0.243023 | 2.812251  |
| 9             | 1             | 0           | -1.788969               | -1.455884 | 2.404857  |
| 10            | 7             | 0           | -1.356826               | -0.700855 | -0.341483 |
| 11            | 8             | 0           | -1.086466               | -0.88019  | -1.526286 |
| 12            | 6             | 0           | -0.054506               | -2.528876 | 0.733098  |
| 13            | 1             | 0           | 0.660321                | -2.751526 | 1.530007  |
| 14            | 1             | 0           | -0.95073                | -3.136966 | 0.889283  |
| 15            | 1             | 0           | 0.383213                | -2.798373 | -0.230849 |
| 16            | 8             | 0           | -3.269567               | 0.745526  | -0.692039 |
| 17            | 8             | 0           | -4.219927               | -0.599394 | -1.930769 |
| 18            | 1             | 0           | -3.529048               | -0.385102 | -2.582866 |
| 19            | 15            | 0           | 1.149132                | -0.023544 | 0.639492  |
| 20            | 8             | 0           | 1.960595                | -0.122034 | 1.885265  |
| 21            | 8             | 0           | 0.540959                | 1.405909  | 0.23814   |

|    |   |   |           |           |           |
|----|---|---|-----------|-----------|-----------|
| 22 | 8 | 0 | 1.921826  | -0.475098 | -0.700272 |
| 23 | 6 | 0 | 1.395512  | 2.53746   | -0.107864 |
| 24 | 1 | 0 | 2.089003  | 2.71477   | 0.720498  |
| 25 | 1 | 0 | 1.964216  | 2.268071  | -1.003036 |
| 26 | 6 | 0 | 3.120673  | -1.304532 | -0.676392 |
| 27 | 1 | 0 | 3.547591  | -1.281707 | 0.329718  |
| 28 | 1 | 0 | 2.808621  | -2.32742  | -0.91124  |
| 29 | 6 | 0 | 4.092733  | -0.778488 | -1.715566 |
| 30 | 1 | 0 | 4.420364  | 0.235754  | -1.468341 |
| 31 | 1 | 0 | 4.976113  | -1.425498 | -1.750175 |
| 32 | 1 | 0 | 3.63414   | -0.766634 | -2.708568 |
| 33 | 6 | 0 | 0.501061  | 3.7359    | -0.356683 |
| 34 | 1 | 0 | -0.056189 | 4.004222  | 0.545526  |
| 35 | 1 | 0 | 1.115584  | 4.593931  | -0.649382 |
| 36 | 1 | 0 | -0.212286 | 3.528085  | -1.158933 |

### Prodd

Standard orientation:

| Center Number | Atomic Number | Atomic Type | Coordinates (Angstroms) |           |           |
|---------------|---------------|-------------|-------------------------|-----------|-----------|
|               |               |             | X                       | Y         | Z         |
| 1             | 6             | 0           | -3.350981               | -0.112304 | -0.054666 |
| 2             | 6             | 0           | -2.521066               | -0.49461  | 1.154442  |
| 3             | 1             | 0           | -3.666454               | -0.95105  | -0.71143  |
| 4             | 6             | 0           | -1.530261               | -1.655967 | 0.964357  |
| 5             | 1             | 0           | -3.249871               | -0.820186 | 1.91317   |
| 6             | 1             | 0           | -2.042472               | 0.403456  | 1.550797  |
| 7             | 6             | 0           | -0.327779               | -1.457591 | 0.001402  |
| 8             | 1             | 0           | -1.113028               | -1.9121   | 1.942699  |
| 9             | 1             | 0           | -2.071731               | -2.544229 | 0.610735  |
| 10            | 7             | 0           | -0.935579               | -1.167646 | -1.352839 |
| 11            | 8             | 0           | -0.421888               | -1.751679 | -2.278344 |
| 12            | 6             | 0           | 0.583429                | -2.689396 | 0.000375  |
| 13            | 1             | 0           | 1.040394                | -2.823173 | 0.984902  |
| 14            | 1             | 0           | -0.006986               | -3.582713 | -0.228351 |
| 15            | 1             | 0           | 1.367233                | -2.606295 | -0.753552 |
| 16            | 8             | 0           | -3.724543               | 1.01963   | -0.283202 |
| 17            | 15            | 0           | 0.676424                | 0.037303  | 0.512906  |
| 18            | 8             | 0           | 0.931105                | 0.087268  | 1.981103  |
| 19            | 8             | 0           | -0.174022               | 1.221814  | -0.145987 |
| 20            | 8             | 0           | 2.014908                | 0.006916  | -0.39445  |
| 21            | 6             | 0           | 0.13417                 | 2.627536  | 0.088419  |
| 22            | 1             | 0           | 0.074309                | 2.816524  | 1.164819  |
| 23            | 1             | 0           | 1.158298                | 2.818111  | -0.250179 |
| 24            | 6             | 0           | 3.322109                | -0.332459 | 0.150448  |
| 25            | 1             | 0           | 3.262898                | -0.330842 | 1.242101  |
| 26            | 1             | 0           | 3.559089                | -1.34441  | -0.194249 |
| 27            | 6             | 0           | 4.33983                 | 0.671862  | -0.358329 |
| 28            | 1             | 0           | 4.110356                | 1.678449  | 0.004154  |

---

|    |   |   |           |          |           |
|----|---|---|-----------|----------|-----------|
| 29 | 1 | 0 | 5.337974  | 0.396934 | 0.000221  |
| 30 | 1 | 0 | 4.358351  | 0.689936 | -1.452021 |
| 31 | 6 | 0 | -0.874267 | 3.453195 | -0.686583 |
| 32 | 1 | 0 | -1.893938 | 3.208012 | -0.37769  |
| 33 | 1 | 0 | -0.692473 | 4.517499 | -0.501328 |
| 34 | 1 | 0 | -0.784838 | 3.266866 | -1.760665 |

---
